# Supplementary material for: Surface Functionalization by Hydrophobin-EPSPS Fusion Protein Allows for the Fast and Simple Detection of Glyphosate
Source: Biosensors (Basel). 2019 Aug 29;9(3):104. doi: 10.3390/bios9030104 (PMC6784374; doi:10.3390/bios9030104)
Supplement: Supplementary file 1 [file biosensors-09-00104-s001.pdf]

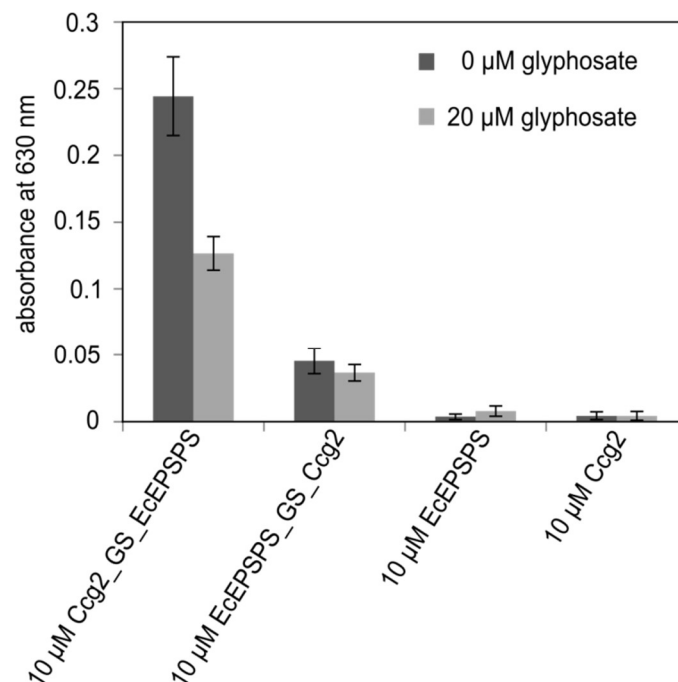

**Figure S1.** Activity measurement for different proteins after immobilization. Proteinsolutions were incubated for 15 min in a polystyrene 96-well plate. Malachite green assay was performed as described in materials and methods (see Section 2.6). Substrate concentrations were 100 and 80  $\mu$ M for S3P and PEP, respectively.

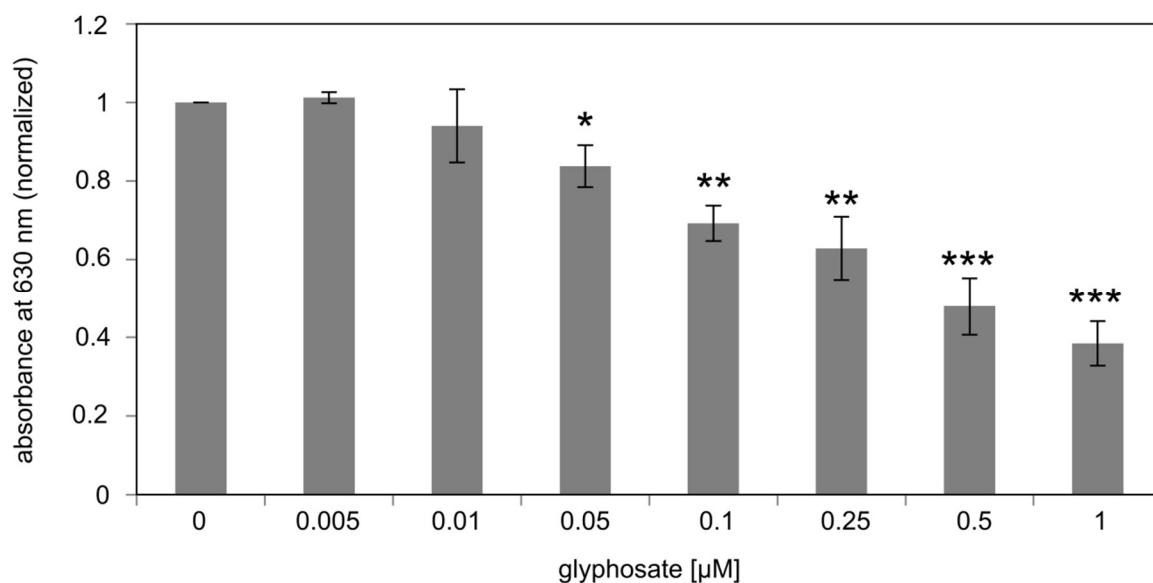

**Figure S2.** Inhibition of immobilized Ccg2\_GS\_EcEPSPS by glyphosate. Measurement of EcEPSPS activity using the malachite green assay with a polystyrene surface functionalized with 1  $\mu$ M Ccg2\_GS\_EcEPSPS:5  $\mu$ M Ccg2. Results were normalized to the sample without glyphosate (0  $\mu$ M). The detection limit is 50 nM glyphosate. \*\*\*  $p \leq 0.001$ ; \*\*  $p \leq 0.01$ ; \*  $p \leq 0.05$ . Absorbance at a wavelength of 630 nm was determined using photometry.
